# Supplementary material
Source: publisher figshare collection journal article supplement (https://acs.figshare.com/ndownloader/files/5187934)
Supplement: Supplementary file 1 [file 5187934]

#ja036999i

data_02062 
 
_audit_creation_method            SHELXL-97 
_chemical_name_systematic 
; 
 ? 
; 
_chemical_name_common             ? 
_chemical_melting_point           ? 
_chemical_formula_moiety          
 'C24 H51 N2 P2 Re Si2'
_chemical_formula_sum 
 'C24 H51 N2 P2 Re Si2' 
_chemical_formula_weight          671.99 
 
loop_ 
 _atom_type_symbol 
 _atom_type_description 
 _atom_type_scat_dispersion_real 
 _atom_type_scat_dispersion_imag 
 _atom_type_scat_source 
 'C'  'C'   0.0033   0.0016 
 'International Tables Vol C Tables 4.2.6.8 and 6.1.1.4' 
 'H'  'H'   0.0000   0.0000 
 'International Tables Vol C Tables 4.2.6.8 and 6.1.1.4' 
 'N'  'N'   0.0061   0.0033 
 'International Tables Vol C Tables 4.2.6.8 and 6.1.1.4' 
 'Si'  'Si'   0.0817   0.0704 
 'International Tables Vol C Tables 4.2.6.8 and 6.1.1.4' 
 'P'  'P'   0.1023   0.0942 
 'International Tables Vol C Tables 4.2.6.8 and 6.1.1.4' 
 'Re'  'Re'  -1.0185   7.2310 
 'International Tables Vol C Tables 4.2.6.8 and 6.1.1.4' 
 
_symmetry_cell_setting            orthorhombic
_symmetry_space_group_name_H-M    Pnma
 
loop_ 
 _symmetry_equiv_pos_as_xyz 
 'x, y, z' 
 '-x+1/2, -y, z+1/2' 
 'x+1/2, -y+1/2, -z+1/2' 
 '-x, y+1/2, -z' 
 '-x, -y, -z' 
 'x-1/2, y, -z-1/2' 
 '-x-1/2, y-1/2, z-1/2' 
 'x, -y-1/2, z' 
 
_cell_length_a                    12.8870(4) 
_cell_length_b                    16.9003(5) 
_cell_length_c                    14.1618(4) 
_cell_angle_alpha                 90.00 
_cell_angle_beta                  90.00 
_cell_angle_gamma                 90.00 
_cell_volume                      3084.36(16) 
_cell_formula_units_Z             4 
_cell_measurement_temperature     120(2) 
_cell_measurement_reflns_used     9331 
_cell_measurement_theta_min       2.5
_cell_measurement_theta_max       32.5
 
_exptl_crystal_description        'irregular block'
_exptl_crystal_colour             black
_exptl_crystal_size_max           0.28 
_exptl_crystal_size_mid           0.25 
_exptl_crystal_size_min           0.18 
_exptl_crystal_density_meas       ? 
_exptl_crystal_density_diffrn     1.447 
_exptl_crystal_density_method     'not measured' 
_exptl_crystal_F_000              1368 
_exptl_absorpt_coefficient_mu     4.135 
_exptl_absorpt_correction_type    'multi-scans'
_exptl_absorpt_correction_T_min   0.3906 
_exptl_absorpt_correction_T_max   0.5231 
_exptl_absorpt_process_details    'SADABS, R. Blessing (1995)'
 
_exptl_special_details 
; 
 ? 
; 
 
_diffrn_ambient_temperature       120(2) 
_diffrn_radiation_wavelength      0.71073 
_diffrn_radiation_type            MoK\a 
_diffrn_radiation_source          'fine-focus sealed tube' 
_diffrn_radiation_monochromator   graphite 
_diffrn_measurement_details
 '0.30 degree frames measured for 5 seconds each' 
_diffrn_measurement_method        \w-scans 
_diffrn_measurement_device        'three-circle goniometer with fixed chi' 
_diffrn_measurement_device_type   'Bruker Platform goniometer' 
_diffrn_detector                  'CCD area detector' 
_diffrn_detector_type             'Bruker SMART 6000' 
_diffrn_detector_area_resol_mean  44.52
_diffrn_standards_number          911 
_diffrn_standards_interval_count  ? 
_diffrn_standards_interval_time   303
_diffrn_standards_decay_%         0.0  
_diffrn_reflns_number             96829 
_diffrn_reflns_av_R_equivalents   0.0308 
_diffrn_reflns_av_sigmaI/netI     0.0111 
_diffrn_reflns_limit_h_min        -19 
_diffrn_reflns_limit_h_max        19 
_diffrn_reflns_limit_k_min        -25 
_diffrn_reflns_limit_k_max        25 
_diffrn_reflns_limit_l_min        -21 
_diffrn_reflns_limit_l_max        21 
_diffrn_reflns_theta_min          2.14 
_diffrn_reflns_theta_max          32.53 
_reflns_number_total              5763 
_reflns_number_gt                 5468 
_reflns_threshold_expression      >2sigma(I) 
 
_computing_data_collection        'SMART (Bruker, 1999)' 
_computing_cell_refinement        'SAINT (Bruker, 1999)' 
_computing_data_reduction         'SAINT (Bruker, 1999)' 
_computing_structure_solution     'SIR-92 (Alatomare et al., 1993)' 
_computing_structure_refinement   'SHELXL-97 (Sheldrick, 1997)' 
_computing_molecular_graphics     'XTEL (local library)'
_computing_publication_material   'XCIF (Bruker, 1999), XTEL (local library)'
 
_refine_special_details 
; 
 Refinement of F^2^ against ALL reflections.  The weighted R-factor wR and 
 goodness of fit S are based on F^2^, conventional R-factors R are based 
 on F, with F set to zero for negative F^2^. The threshold expression of 
 F^2^ > 2sigma(F^2^) is used only for calculating R-factors(gt) etc. and is 
 not relevant to the choice of reflections for refinement.  R-factors based 
 on F^2^ are statistically about twice as large as those based on F, and R- 
 factors based on ALL data will be even larger. 
; 
 
_refine_ls_structure_factor_coef  Fsqd  
_refine_ls_matrix_type            full 
_refine_ls_weighting_scheme       calc  
_refine_ls_weighting_details 
 'calc w=1/[\s^2^(Fo^2^)+(0.0170P)^2^+2.1157P] where P=(Fo^2^+2Fc^2^)/3' 
_atom_sites_solution_primary      direct 
_atom_sites_solution_secondary    difmap 
_atom_sites_solution_hydrogens    mixed 
_refine_ls_hydrogen_treatment     mixed 
_refine_ls_extinction_method      none 
_refine_ls_extinction_coef        ? 
_refine_ls_number_reflns          5763 
_refine_ls_number_parameters      238 
_refine_ls_number_restraints      57 
_refine_ls_R_factor_all           0.0160 
_refine_ls_R_factor_gt            0.0146 
_refine_ls_wR_factor_ref          0.0386 
_refine_ls_wR_factor_gt           0.0379 
_refine_ls_goodness_of_fit_ref    1.106 
_refine_ls_restrained_S_all       1.159 
_refine_ls_shift/su_max           0.007 
_refine_ls_shift/su_mean          0.000 
 
loop_ 
 _atom_site_label 
 _atom_site_type_symbol 
 _atom_site_fract_x 
 _atom_site_fract_y 
 _atom_site_fract_z 
 _atom_site_U_iso_or_equiv 
 _atom_site_adp_type 
 _atom_site_occupancy 
 _atom_site_symmetry_multiplicity 
 _atom_site_calc_flag 
 _atom_site_refinement_flags 
 _atom_site_disorder_assembly 
 _atom_site_disorder_group 
Re1 Re 0.264486(5) 0.2500 0.537062(4) 0.01282(2) Uani 1 2 d SD . . 
H1R H 0.318(3) 0.2500 0.643(3) 0.049(10) Uiso 1 2 d S . . 
N1 N 0.37651(13) 0.2500 0.43794(12) 0.0183(3) Uani 1 2 d SD . . 
Si1 Si 0.43884(9) 0.34011(6) 0.40989(10) 0.0272(2) Uani 0.50 1 d PD . 1 
C1 C 0.5721(3) 0.3438(2) 0.4628(5) 0.068(2) Uani 0.50 1 d PDU . 1 
H1A H 0.5685 0.3289 0.5296 0.07(2) Uiso 0.50 1 calc PR . 1 
H1B H 0.5999 0.3975 0.4572 0.08(2) Uiso 0.50 1 calc PR . 1 
H1C H 0.6176 0.3068 0.4293 0.10(3) Uiso 0.50 1 calc PR . 1 
C2 C 0.4503(5) 0.3557(3) 0.2805(2) 0.080(3) Uani 0.50 1 d PDU . 1 
H2A H 0.3811 0.3548 0.2518 0.11(4) Uiso 0.50 1 calc PR . 1 
H2B H 0.4929 0.3136 0.2530 0.13(4) Uiso 0.50 1 calc PR . 1 
H2C H 0.4830 0.4071 0.2683 0.09(2) Uiso 0.50 1 calc PR . 1 
C3 C 0.3659(3) 0.42469(13) 0.4615(3) 0.0216(3) Uani 0.50 1 d PD . 1 
H3A H 0.4138 0.4592 0.4975 0.026 Uiso 0.50 1 calc PR . 1 
H3B H 0.3342 0.4565 0.4104 0.026 Uiso 0.50 1 calc PR . 1 
P1 P 0.2641(5) 0.38675(16) 0.5401(5) 0.0137(5) Uani 0.50 1 d PDU . 1 
C7 C 0.1470(5) 0.4434(10) 0.5047(12) 0.0242(5) Uani 0.50 1 d PD . 1 
H7 H 0.0881 0.4239 0.5443 0.029 Uiso 0.50 1 calc PR . 1 
C8 C 0.154(2) 0.5329(10) 0.5191(16) 0.0343(19) Uani 0.50 1 d PD . 1 
H8A H 0.2165 0.5531 0.4884 0.051 Uiso 0.50 1 calc PR . 1 
H8B H 0.1566 0.5446 0.5869 0.051 Uiso 0.50 1 calc PR . 1 
H8C H 0.0926 0.5583 0.4914 0.051 Uiso 0.50 1 calc PR . 1 
C9 C 0.1200(17) 0.4250(16) 0.4011(17) 0.0311(17) Uani 0.50 1 d PD . 1 
H9A H 0.0521 0.4476 0.3858 0.047 Uiso 0.50 1 calc PR . 1 
H9B H 0.1179 0.3675 0.3919 0.047 Uiso 0.50 1 calc PR . 1 
H9C H 0.1729 0.4480 0.3596 0.047 Uiso 0.50 1 calc PR . 1 
Si1D Si 0.41023(10) 0.33523(6) 0.37742(7) 0.0240(2) Uani 0.50 1 d PD . 2 
C1D C 0.5533(3) 0.3439(2) 0.3565(3) 0.0460(11) Uani 0.50 1 d PDU . 2 
H1D H 0.5758 0.3020 0.3132 0.074(19) Uiso 0.50 1 calc PR . 2 
H1E H 0.5903 0.3385 0.4167 0.14(4) Uiso 0.50 1 calc PR . 2 
H1F H 0.5688 0.3957 0.3287 0.050(14) Uiso 0.50 1 calc PR . 2 
C2D C 0.3433(4) 0.3418(2) 0.2611(2) 0.0459(10) Uani 0.50 1 d PDU . 2 
H2D H 0.3724 0.3022 0.2180 0.054(15) Uiso 0.50 1 calc PR . 2 
H2E H 0.3534 0.3947 0.2344 0.051(15) Uiso 0.50 1 calc PR . 2 
H2F H 0.2690 0.3318 0.2696 0.044(14) Uiso 0.50 1 calc PR . 2 
C3D C 0.3725(3) 0.42372(13) 0.4486(3) 0.0216(3) Uani 0.50 1 d PD . 2 
H3C H 0.4343 0.4462 0.4804 0.026 Uiso 0.50 1 calc PR . 2 
H3D H 0.3425 0.4649 0.4070 0.026 Uiso 0.50 1 calc PR . 2 
P1D P 0.2762(5) 0.39257(16) 0.5371(4) 0.0134(4) Uani 0.50 1 d PDU . 2 
C7D C 0.1555(5) 0.4432(10) 0.4987(12) 0.0242(5) Uani 0.50 1 d PD . 2 
H7D H 0.0984 0.4246 0.5412 0.029 Uiso 0.50 1 calc PR . 2 
C8D C 0.158(2) 0.5334(10) 0.5045(17) 0.0343(19) Uani 0.50 1 d PD . 2 
H8D1 H 0.2188 0.5534 0.4709 0.051 Uiso 0.50 1 calc PR . 2 
H8D2 H 0.1611 0.5497 0.5709 0.051 Uiso 0.50 1 calc PR . 2 
H8D3 H 0.0947 0.5550 0.4755 0.051 Uiso 0.50 1 calc PR . 2 
C9D C 0.1273(17) 0.4170(16) 0.3978(17) 0.0311(17) Uani 0.50 1 d PD . 2 
H9D1 H 0.0541 0.4288 0.3855 0.047 Uiso 0.50 1 calc PR . 2 
H9D2 H 0.1390 0.3599 0.3913 0.047 Uiso 0.50 1 calc PR . 2 
H9D3 H 0.1708 0.4455 0.3523 0.047 Uiso 0.50 1 calc PR . 2 
N2 N 0.12303(13) 0.2500 0.61958(11) 0.0184(3) Uani 1 2 d S . . 
C4 C 0.30411(13) 0.43924(9) 0.65154(11) 0.0261(3) Uani 1 1 d . . . 
H4A H 0.3006 0.4976 0.6406 0.034(6) Uiso 1 1 calc R . 1 
C5 C 0.22467(16) 0.41675(12) 0.72709(12) 0.0357(4) Uani 1 1 d . . . 
H5A H 0.2428 0.4426 0.7868 0.051(8) Uiso 1 1 calc R . . 
H5B H 0.2248 0.3592 0.7357 0.039(6) Uiso 1 1 calc R . . 
H5C H 0.1555 0.4341 0.7071 0.049(7) Uiso 1 1 calc R . . 
C6 C 0.41380(15) 0.41768(11) 0.68331(13) 0.0353(4) Uani 1 1 d . . . 
H6A H 0.4267 0.4399 0.7461 0.060(8) Uiso 1 1 calc R . . 
H6B H 0.4642 0.4393 0.6384 0.044(7) Uiso 1 1 calc R . . 
H6C H 0.4208 0.3600 0.6858 0.043(6) Uiso 1 1 calc R . . 
C10 C 0.10758(15) 0.2500 0.52594(13) 0.0172(3) Uani 1 2 d S . . 
C11 C 0.00806(16) 0.2500 0.48893(15) 0.0216(3) Uani 1 2 d S . . 
H11 H -0.0029 0.2500 0.4226 0.035(8) Uiso 1 2 calc SR . . 
C12 C -0.07625(16) 0.2500 0.55191(17) 0.0250(4) Uani 1 2 d S . . 
C13 C -0.05711(17) 0.2500 0.64797(17) 0.0288(4) Uani 1 2 d S . . 
H13 H -0.1132 0.2500 0.6915 0.043(9) Uiso 1 2 calc SR . . 
C14 C 0.04558(17) 0.2500 0.68065(15) 0.0254(4) Uani 1 2 d S . . 
H14 H 0.0594 0.2500 0.7465 0.030(7) Uiso 1 2 calc SR . . 
C15 C -0.18542(18) 0.2500 0.5142(2) 0.0360(5) Uani 1 2 d S . . 
H15A H -0.2330 0.2308 0.5631 0.054 Uiso 0.50 1 calc PR . . 
H15B H -0.1895 0.2153 0.4589 0.054 Uiso 0.50 1 calc PR . . 
H15C H -0.2049 0.3039 0.4960 0.054 Uiso 0.50 1 calc PR . . 
 
loop_ 
 _atom_site_aniso_label 
 _atom_site_aniso_U_11 
 _atom_site_aniso_U_22 
 _atom_site_aniso_U_33 
 _atom_site_aniso_U_23 
 _atom_site_aniso_U_13 
 _atom_site_aniso_U_12 
Re1 0.01520(4) 0.01136(3) 0.01189(3) 0.000 0.00048(2) 0.000 
N1 0.0179(7) 0.0188(7) 0.0183(7) 0.000 0.0032(5) 0.000 
Si1 0.0271(5) 0.0209(4) 0.0335(6) 0.0061(4) 0.0150(4) 0.0026(4) 
C1 0.0202(16) 0.029(2) 0.156(7) -0.011(3) -0.005(2) -0.0014(14) 
C2 0.154(7) 0.036(2) 0.050(3) 0.0015(19) 0.066(4) -0.012(3) 
C3 0.0256(8) 0.0198(6) 0.0192(10) 0.0046(5) 0.0077(6) -0.0047(5) 
P1 0.0127(11) 0.0098(6) 0.0186(6) 0.0019(5) 0.0024(5) -0.0041(6) 
C7 0.0231(10) 0.0207(6) 0.0288(17) 0.0062(9) 0.0017(10) 0.0053(11) 
C8 0.0415(18) 0.0215(7) 0.040(6) 0.007(2) 0.006(3) 0.0121(9) 
C9 0.032(2) 0.031(4) 0.0310(14) 0.012(2) -0.0084(18) 0.001(2) 
Si1D 0.0304(6) 0.0224(4) 0.0191(5) 0.0069(4) 0.0087(4) 0.0028(4) 
C1D 0.0372(19) 0.0285(16) 0.072(3) 0.0024(18) 0.031(2) -0.0047(14) 
C2D 0.078(3) 0.041(2) 0.0183(14) 0.0056(13) 0.0025(17) 0.008(2) 
C3D 0.0256(8) 0.0198(6) 0.0192(10) 0.0046(5) 0.0077(6) -0.0047(5) 
P1D 0.0151(13) 0.0091(5) 0.0159(7) 0.0025(5) 0.0002(5) -0.0044(5) 
C7D 0.0231(10) 0.0207(6) 0.0288(17) 0.0062(9) 0.0017(10) 0.0053(11) 
C8D 0.0415(18) 0.0215(7) 0.040(6) 0.007(2) 0.006(3) 0.0121(9) 
C9D 0.032(2) 0.031(4) 0.0310(14) 0.012(2) -0.0084(18) 0.001(2) 
N2 0.0198(7) 0.0180(6) 0.0173(7) 0.000 0.0029(5) 0.000 
C4 0.0360(8) 0.0170(6) 0.0254(6) -0.0045(5) -0.0033(6) -0.0032(5) 
C5 0.0494(11) 0.0332(8) 0.0245(7) -0.0113(6) 0.0046(7) -0.0054(7) 
C6 0.0406(9) 0.0314(8) 0.0340(8) -0.0014(7) -0.0137(7) -0.0082(7) 
C10 0.0198(8) 0.0151(7) 0.0167(7) 0.000 0.0009(6) 0.000 
C11 0.0201(8) 0.0215(8) 0.0233(9) 0.000 -0.0021(7) 0.000 
C12 0.0172(8) 0.0194(8) 0.0385(11) 0.000 0.0011(7) 0.000 
C13 0.0218(9) 0.0299(10) 0.0346(11) 0.000 0.0107(8) 0.000 
C14 0.0259(9) 0.0296(10) 0.0208(9) 0.000 0.0074(7) 0.000 
C15 0.0193(10) 0.0313(11) 0.0574(16) 0.000 -0.0038(10) 0.000 
 
_geom_special_details 
; 
 All esds (except the esd in the dihedral angle between two l.s. planes) 
 are estimated using the full covariance matrix.  The cell esds are taken 
 into account individually in the estimation of esds in distances, angles 
 and torsion angles; correlations between esds in cell parameters are only 
 used when they are defined by crystal symmetry.  An approximate (isotropic) 
 treatment of cell esds is used for estimating esds involving l.s. planes. 
; 
 
loop_ 
 _geom_bond_atom_site_label_1 
 _geom_bond_atom_site_label_2 
 _geom_bond_distance 
 _geom_bond_site_symmetry_2 
 _geom_bond_publ_flag 
Re1 N1 2.0136(16) . ? 
Re1 C10 2.028(2) . ? 
Re1 N2 2.1653(16) . ? 
Re1 P1 2.311(3) . ? 
Re1 P1 2.311(3) 8_565 ? 
Re1 P1D 2.414(3) . ? 
Re1 P1D 2.414(3) 8_565 ? 
Re1 H1R 1.65(4) . ? 
N1 Si1D 1.7315(12) 8_565 ? 
N1 Si1D 1.7315(12) . ? 
N1 Si1 1.7670(12) . ? 
N1 Si1 1.7670(12) 8_565 ? 
Si1 C2 1.858(3) . ? 
Si1 C3 1.860(2) . ? 
Si1 C1 1.875(3) . ? 
C1 H1A 0.9800 . ? 
C1 H1B 0.9800 . ? 
C1 H1C 0.9800 . ? 
C2 H2A 0.9800 . ? 
C2 H2B 0.9800 . ? 
C2 H2C 0.9800 . ? 
C3 P1 1.836(2) . ? 
C3 H3A 0.9900 . ? 
C3 H3B 0.9900 . ? 
P1 C7 1.857(2) . ? 
P1 C4 1.882(7) . ? 
C7 C8 1.528(3) . ? 
C7 C9 1.540(3) . ? 
C7 H7 1.0000 . ? 
C8 H8A 0.9800 . ? 
C8 H8B 0.9800 . ? 
C8 H8C 0.9800 . ? 
C9 H9A 0.9800 . ? 
C9 H9B 0.9800 . ? 
C9 H9C 0.9800 . ? 
Si1D C2D 1.863(3) . ? 
Si1D C3D 1.868(2) . ? 
Si1D C1D 1.873(3) . ? 
C1D H1D 0.9800 . ? 
C1D H1E 0.9800 . ? 
C1D H1F 0.9800 . ? 
C2D H2D 0.9800 . ? 
C2D H2E 0.9800 . ? 
C2D H2F 0.9800 . ? 
C3D P1D 1.841(2) . ? 
C3D H3C 0.9900 . ? 
C3D H3D 0.9900 . ? 
P1D C4 1.838(7) . ? 
P1D C7D 1.857(2) . ? 
C7D C8D 1.528(3) . ? 
C7D C9D 1.540(3) . ? 
C7D H7D 1.0000 . ? 
C8D H8D1 0.9800 . ? 
C8D H8D2 0.9800 . ? 
C8D H8D3 0.9800 . ? 
C9D H9D1 0.9800 . ? 
C9D H9D2 0.9800 . ? 
C9D H9D3 0.9800 . ? 
N2 C14 1.321(2) . ? 
N2 C10 1.341(2) . ? 
C4 C6 1.527(2) . ? 
C4 C5 1.529(2) . ? 
C4 H4A 1.0000 . ? 
C5 H5A 0.9800 . ? 
C5 H5B 0.9800 . ? 
C5 H5C 0.9800 . ? 
C6 H6A 0.9800 . ? 
C6 H6B 0.9800 . ? 
C6 H6C 0.9800 . ? 
C10 C11 1.385(3) . ? 
C11 C12 1.406(3) . ? 
C11 H11 0.9500 . ? 
C12 C13 1.382(3) . ? 
C12 C15 1.505(3) . ? 
C13 C14 1.402(3) . ? 
C13 H13 0.9500 . ? 
C14 H14 0.9500 . ? 
C15 H15A 0.9800 . ? 
C15 H15B 0.9800 . ? 
C15 H15C 0.9800 . ? 
 
loop_ 
 _geom_angle_atom_site_label_1 
 _geom_angle_atom_site_label_2 
 _geom_angle_atom_site_label_3 
 _geom_angle 
 _geom_angle_site_symmetry_1 
 _geom_angle_site_symmetry_3 
 _geom_angle_publ_flag 
N1 Re1 C10 131.35(7) . . ? 
N1 Re1 N2 168.47(7) . . ? 
C10 Re1 N2 37.12(7) . . ? 
N1 Re1 P1 90.83(6) . . ? 
C10 Re1 P1 89.97(17) . . ? 
N2 Re1 P1 89.33(7) . . ? 
N1 Re1 P1 90.83(5) . 8_565 ? 
C10 Re1 P1 89.97(17) . 8_565 ? 
N2 Re1 P1 89.33(7) . 8_565 ? 
P1 Re1 P1 177.8(3) . 8_565 ? 
N1 Re1 P1D 87.45(5) . . ? 
C10 Re1 P1D 93.57(16) . . ? 
N2 Re1 P1D 93.00(7) . . ? 
P1 Re1 P1D 3.8(2) . . ? 
P1 Re1 P1D 176.36(4) 8_565 . ? 
N1 Re1 P1D 87.45(5) . 8_565 ? 
C10 Re1 P1D 93.57(16) . 8_565 ? 
N2 Re1 P1D 93.00(7) . 8_565 ? 
P1 Re1 P1D 176.36(4) . 8_565 ? 
P1 Re1 P1D 3.8(2) 8_565 8_565 ? 
P1D Re1 P1D 172.8(3) . 8_565 ? 
N1 Re1 H1R 109.5(13) . . ? 
C10 Re1 H1R 119.2(13) . . ? 
N2 Re1 H1R 82.0(13) . . ? 
P1 Re1 H1R 89.1(2) . . ? 
P1 Re1 H1R 89.1(2) 8_565 . ? 
P1D Re1 H1R 88.5(2) . . ? 
P1D Re1 H1R 88.5(2) 8_565 . ? 
Si1D N1 Si1D 112.59(11) 8_565 . ? 
Si1D N1 Si1 119.45(10) 8_565 . ? 
Si1D N1 Si1 19.56(4) . . ? 
Si1D N1 Si1 19.56(4) 8_565 8_565 ? 
Si1D N1 Si1 119.45(10) . 8_565 ? 
Si1 N1 Si1 119.05(11) . 8_565 ? 
Si1D N1 Re1 121.67(6) 8_565 . ? 
Si1D N1 Re1 121.67(6) . . ? 
Si1 N1 Re1 118.86(6) . . ? 
Si1 N1 Re1 118.86(6) 8_565 . ? 
N1 Si1 C2 112.37(17) . . ? 
N1 Si1 C3 110.13(11) . . ? 
C2 Si1 C3 108.57(17) . . ? 
N1 Si1 C1 110.79(16) . . ? 
C2 Si1 C1 108.5(2) . . ? 
C3 Si1 C1 106.29(18) . . ? 
P1 C3 Si1 109.32(13) . . ? 
P1 C3 H3A 109.8 . . ? 
Si1 C3 H3A 109.8 . . ? 
P1 C3 H3B 109.8 . . ? 
Si1 C3 H3B 109.8 . . ? 
H3A C3 H3B 108.3 . . ? 
C3 P1 C7 103.68(15) . . ? 
C3 P1 C4 98.5(3) . . ? 
C7 P1 C4 101.9(7) . . ? 
C3 P1 Re1 109.66(10) . . ? 
C7 P1 Re1 120.8(7) . . ? 
C4 P1 Re1 119.1(3) . . ? 
C8 C7 C9 110.0(2) . . ? 
C8 C7 P1 115.3(2) . . ? 
C9 C7 P1 109.66(18) . . ? 
C8 C7 H7 107.2 . . ? 
C9 C7 H7 107.2 . . ? 
P1 C7 H7 107.2 . . ? 
N1 Si1D C2D 111.78(17) . . ? 
N1 Si1D C3D 109.48(11) . . ? 
C2D Si1D C3D 108.03(17) . . ? 
N1 Si1D C1D 112.97(14) . . ? 
C2D Si1D C1D 108.1(2) . . ? 
C3D Si1D C1D 106.21(16) . . ? 
Si1D C1D H1D 109.5 . . ? 
Si1D C1D H1E 109.5 . . ? 
H1D C1D H1E 109.5 . . ? 
Si1D C1D H1F 109.5 . . ? 
H1D C1D H1F 109.5 . . ? 
H1E C1D H1F 109.5 . . ? 
Si1D C2D H2D 109.5 . . ? 
Si1D C2D H2E 109.5 . . ? 
H2D C2D H2E 109.5 . . ? 
Si1D C2D H2F 109.5 . . ? 
H2D C2D H2F 109.5 . . ? 
H2E C2D H2F 109.5 . . ? 
P1D C3D Si1D 108.30(13) . . ? 
P1D C3D H3C 110.0 . . ? 
Si1D C3D H3C 110.0 . . ? 
P1D C3D H3D 110.0 . . ? 
Si1D C3D H3D 110.0 . . ? 
H3C C3D H3D 108.4 . . ? 
C4 P1D C3D 110.2(3) . . ? 
C4 P1D C7D 103.0(7) . . ? 
C3D P1D C7D 103.52(15) . . ? 
C4 P1D Re1 116.2(3) . . ? 
C3D P1D Re1 109.11(10) . . ? 
C7D P1D Re1 114.0(7) . . ? 
C8D C7D C9D 110.0(2) . . ? 
C8D C7D P1D 115.3(2) . . ? 
C9D C7D P1D 109.69(19) . . ? 
C8D C7D H7D 107.2 . . ? 
C9D C7D H7D 107.2 . . ? 
P1D C7D H7D 107.2 . . ? 
C7D C8D H8D1 109.5 . . ? 
C7D C8D H8D2 109.5 . . ? 
H8D1 C8D H8D2 109.5 . . ? 
C7D C8D H8D3 109.5 . . ? 
H8D1 C8D H8D3 109.5 . . ? 
H8D2 C8D H8D3 109.5 . . ? 
C7D C9D H9D1 109.5 . . ? 
C7D C9D H9D2 109.5 . . ? 
H9D1 C9D H9D2 109.5 . . ? 
C7D C9D H9D3 109.5 . . ? 
H9D1 C9D H9D3 109.5 . . ? 
H9D2 C9D H9D3 109.5 . . ? 
C14 N2 C10 122.37(18) . . ? 
C14 N2 Re1 171.75(15) . . ? 
C10 N2 Re1 65.88(11) . . ? 
C6 C4 C5 110.75(15) . . ? 
C6 C4 P1D 109.8(2) . . ? 
C5 C4 P1D 112.29(16) . . ? 
C6 C4 P1 112.8(2) . . ? 
C5 C4 P1 106.63(14) . . ? 
P1D C4 P1 5.7(2) . . ? 
C6 C4 H4A 108.8 . . ? 
C5 C4 H4A 108.8 . . ? 
P1D C4 H4A 106.2 . . ? 
P1 C4 H4A 108.8 . . ? 
C4 C5 H5A 109.5 . . ? 
C4 C5 H5B 109.5 . . ? 
H5A C5 H5B 109.5 . . ? 
C4 C5 H5C 109.5 . . ? 
H5A C5 H5C 109.5 . . ? 
H5B C5 H5C 109.5 . . ? 
C4 C6 H6A 109.5 . . ? 
C4 C6 H6B 109.5 . . ? 
H6A C6 H6B 109.5 . . ? 
C4 C6 H6C 109.5 . . ? 
H6A C6 H6C 109.5 . . ? 
H6B C6 H6C 109.5 . . ? 
N2 C10 C11 120.77(18) . . ? 
N2 C10 Re1 77.00(11) . . ? 
C11 C10 Re1 162.22(15) . . ? 
C10 C11 C12 118.38(19) . . ? 
C10 C11 H11 120.8 . . ? 
C12 C11 H11 120.8 . . ? 
C13 C12 C11 119.1(2) . . ? 
C13 C12 C15 121.1(2) . . ? 
C11 C12 C15 119.8(2) . . ? 
C12 C13 C14 119.6(2) . . ? 
C12 C13 H13 120.2 . . ? 
C14 C13 H13 120.2 . . ? 
N2 C14 C13 119.8(2) . . ? 
N2 C14 H14 120.1 . . ? 
C13 C14 H14 120.1 . . ? 
C12 C15 H15A 109.5 . . ? 
C12 C15 H15B 109.5 . . ? 
H15A C15 H15B 109.5 . . ? 
C12 C15 H15C 109.5 . . ? 
H15A C15 H15C 109.5 . . ? 
H15B C15 H15C 109.5 . . ? 
 
loop_ 
 _geom_torsion_atom_site_label_1 
 _geom_torsion_atom_site_label_2 
 _geom_torsion_atom_site_label_3 
 _geom_torsion_atom_site_label_4 
 _geom_torsion 
 _geom_torsion_site_symmetry_1 
 _geom_torsion_site_symmetry_2 
 _geom_torsion_site_symmetry_3 
 _geom_torsion_site_symmetry_4 
 _geom_torsion_publ_flag 
C10 Re1 N1 Si1D -77.80(10) . . . 8_565 ? 
N2 Re1 N1 Si1D -77.80(10) . . . 8_565 ? 
P1 Re1 N1 Si1D -168.5(2) . . . 8_565 ? 
P1 Re1 N1 Si1D 12.9(2) 8_565 . . 8_565 ? 
P1D Re1 N1 Si1D -170.3(2) . . . 8_565 ? 
P1D Re1 N1 Si1D 14.7(2) 8_565 . . 8_565 ? 
C10 Re1 N1 Si1D 77.80(10) . . . . ? 
N2 Re1 N1 Si1D 77.80(11) . . . . ? 
P1 Re1 N1 Si1D -12.9(2) . . . . ? 
P1 Re1 N1 Si1D 168.5(2) 8_565 . . . ? 
P1D Re1 N1 Si1D -14.7(2) . . . . ? 
P1D Re1 N1 Si1D 170.3(2) 8_565 . . . ? 
C10 Re1 N1 Si1 100.24(10) . . . . ? 
N2 Re1 N1 Si1 100.24(10) . . . . ? 
P1 Re1 N1 Si1 9.6(2) . . . . ? 
P1 Re1 N1 Si1 -169.1(2) 8_565 . . . ? 
P1D Re1 N1 Si1 7.7(2) . . . . ? 
P1D Re1 N1 Si1 -167.2(2) 8_565 . . . ? 
C10 Re1 N1 Si1 -100.24(10) . . . 8_565 ? 
N2 Re1 N1 Si1 -100.24(10) . . . 8_565 ? 
P1 Re1 N1 Si1 169.1(2) . . . 8_565 ? 
P1 Re1 N1 Si1 -9.6(2) 8_565 . . 8_565 ? 
P1D Re1 N1 Si1 167.2(2) . . . 8_565 ? 
P1D Re1 N1 Si1 -7.7(2) 8_565 . . 8_565 ? 
Si1D N1 Si1 C2 44.2(3) 8_565 . . . ? 
Si1D N1 Si1 C2 -30.0(3) . . . . ? 
Si1 N1 Si1 C2 66.7(3) 8_565 . . . ? 
Re1 N1 Si1 C2 -133.9(2) . . . . ? 
Si1D N1 Si1 C3 165.40(17) 8_565 . . . ? 
Si1D N1 Si1 C3 91.2(2) . . . . ? 
Si1 N1 Si1 C3 -172.16(17) 8_565 . . . ? 
Re1 N1 Si1 C3 -12.7(2) . . . . ? 
Si1D N1 Si1 C1 -77.3(3) 8_565 . . . ? 
Si1D N1 Si1 C1 -151.5(3) . . . . ? 
Si1 N1 Si1 C1 -54.8(3) 8_565 . . . ? 
Re1 N1 Si1 C1 104.6(2) . . . . ? 
N1 Si1 C3 P1 8.7(4) . . . . ? 
C2 Si1 C3 P1 132.1(4) . . . . ? 
C1 Si1 C3 P1 -111.4(4) . . . . ? 
Si1 C3 P1 C7 -132.8(7) . . . . ? 
Si1 C3 P1 C4 122.7(2) . . . . ? 
Si1 C3 P1 Re1 -2.5(5) . . . . ? 
N1 Re1 P1 C3 -3.6(4) . . . . ? 
C10 Re1 P1 C3 -134.9(4) . . . . ? 
N2 Re1 P1 C3 -172.0(4) . . . . ? 
P1 Re1 P1 C3 137(9) 8_565 . . . ? 
P1D Re1 P1 C3 25(5) . . . . ? 
P1D Re1 P1 C3 58.1(7) 8_565 . . . ? 
N1 Re1 P1 C7 116.8(4) . . . . ? 
C10 Re1 P1 C7 -14.6(4) . . . . ? 
N2 Re1 P1 C7 -51.7(4) . . . . ? 
P1 Re1 P1 C7 -103(9) 8_565 . . . ? 
P1D Re1 P1 C7 145(6) . . . . ? 
P1D Re1 P1 C7 178(6) 8_565 . . . ? 
N1 Re1 P1 C4 -115.9(2) . . . . ? 
C10 Re1 P1 C4 112.8(2) . . . . ? 
N2 Re1 P1 C4 75.7(2) . . . . ? 
P1 Re1 P1 C4 24(10) 8_565 . . . ? 
P1D Re1 P1 C4 -88(6) . . . . ? 
P1D Re1 P1 C4 -54.2(5) 8_565 . . . ? 
C3 P1 C7 C8 -62.4(13) . . . . ? 
C4 P1 C7 C8 39.5(12) . . . . ? 
Re1 P1 C7 C8 174.3(11) . . . . ? 
C3 P1 C7 C9 62.3(13) . . . . ? 
C4 P1 C7 C9 164.3(12) . . . . ? 
Re1 P1 C7 C9 -61.0(11) . . . . ? 
Si1D N1 Si1D C2D 61.1(2) 8_565 . . . ? 
Si1 N1 Si1D C2D 175.9(3) . . . . ? 
Si1 N1 Si1D C2D 81.5(2) 8_565 . . . ? 
Re1 N1 Si1D C2D -96.54(19) . . . . ? 
Si1D N1 Si1D C3D -179.27(16) 8_565 . . . ? 
Si1 N1 Si1D C3D -64.5(2) . . . . ? 
Si1 N1 Si1D C3D -158.86(17) 8_565 . . . ? 
Re1 N1 Si1D C3D 23.1(2) . . . . ? 
Si1D N1 Si1D C1D -61.1(2) 8_565 . . . ? 
Si1 N1 Si1D C1D 53.7(2) . . . . ? 
Si1 N1 Si1D C1D -40.7(2) 8_565 . . . ? 
Re1 N1 Si1D C1D 141.24(18) . . . . ? 
N1 Si1D C3D P1D -18.5(4) . . . . ? 
C2D Si1D C3D P1D 103.4(4) . . . . ? 
C1D Si1D C3D P1D -140.8(4) . . . . ? 
Si1D C3D P1D C4 137.8(2) . . . . ? 
Si1D C3D P1D C7D -112.6(7) . . . . ? 
Si1D C3D P1D Re1 9.1(5) . . . . ? 
N1 Re1 P1D C4 -123.4(3) . . . . ? 
C10 Re1 P1D C4 105.3(3) . . . . ? 
N2 Re1 P1D C4 68.1(3) . . . . ? 
P1 Re1 P1D C4 85(6) . . . . ? 
P1 Re1 P1D C4 -61.6(6) 8_565 . . . ? 
P1D Re1 P1D C4 -79(2) 8_565 . . . ? 
N1 Re1 P1D C3D 1.9(4) . . . . ? 
C10 Re1 P1D C3D -129.4(4) . . . . ? 
N2 Re1 P1D C3D -166.6(4) . . . . ? 
P1 Re1 P1D C3D -150(6) . . . . ? 
P1 Re1 P1D C3D 63.6(5) 8_565 . . . ? 
P1D Re1 P1D C3D 46(3) 8_565 . . . ? 
N1 Re1 P1D C7D 117.0(4) . . . . ? 
C10 Re1 P1D C7D -14.3(4) . . . . ? 
N2 Re1 P1D C7D -51.4(4) . . . . ? 
P1 Re1 P1D C7D -35(6) . . . . ? 
P1 Re1 P1D C7D 179(100) 8_565 . . . ? 
P1D Re1 P1D C7D 162(3) 8_565 . . . ? 
C4 P1D C7D C8D 49.2(12) . . . . ? 
C3D P1D C7D C8D -65.7(13) . . . . ? 
Re1 P1D C7D C8D 175.9(11) . . . . ? 
C4 P1D C7D C9D 174.0(12) . . . . ? 
C3D P1D C7D C9D 59.1(13) . . . . ? 
Re1 P1D C7D C9D -59.3(11) . . . . ? 
N1 Re1 N2 C14 180.000(3) . . . . ? 
C10 Re1 N2 C14 180.000(3) . . . . ? 
P1 Re1 N2 C14 -89.2(2) . . . . ? 
P1 Re1 N2 C14 89.2(2) 8_565 . . . ? 
P1D Re1 N2 C14 -88.0(2) . . . . ? 
P1D Re1 N2 C14 88.0(2) 8_565 . . . ? 
N1 Re1 N2 C10 0.0 . . . . ? 
P1 Re1 N2 C10 90.8(2) . . . . ? 
P1 Re1 N2 C10 -90.8(2) 8_565 . . . ? 
P1D Re1 N2 C10 92.0(2) . . . . ? 
P1D Re1 N2 C10 -92.0(2) 8_565 . . . ? 
C3D P1D C4 C6 -57.7(3) . . . . ? 
C7D P1D C4 C6 -167.6(4) . . . . ? 
Re1 P1D C4 C6 67.0(2) . . . . ? 
C3D P1D C4 C5 178.7(2) . . . . ? 
C7D P1D C4 C5 68.8(4) . . . . ? 
Re1 P1D C4 C5 -56.6(3) . . . . ? 
C3D P1D C4 P1 179(100) . . . . ? 
C7D P1D C4 P1 69(4) . . . . ? 
Re1 P1D C4 P1 -56(3) . . . . ? 
C3 P1 C4 C6 -59.9(3) . . . . ? 
C7 P1 C4 C6 -166.0(4) . . . . ? 
Re1 P1 C4 C6 58.3(2) . . . . ? 
C3 P1 C4 C5 178.3(2) . . . . ? 
C7 P1 C4 C5 72.2(3) . . . . ? 
Re1 P1 C4 C5 -63.5(3) . . . . ? 
C3 P1 C4 P1D -1(3) . . . . ? 
C7 P1 C4 P1D -107(3) . . . . ? 
Re1 P1 C4 P1D 117(4) . . . . ? 
C14 N2 C10 C11 0.0 . . . . ? 
Re1 N2 C10 C11 180.0 . . . . ? 
C14 N2 C10 Re1 180.0 . . . . ? 
N1 Re1 C10 N2 180.0 . . . . ? 
P1 Re1 C10 N2 -88.92(16) . . . . ? 
P1 Re1 C10 N2 88.92(16) 8_565 . . . ? 
P1D Re1 C10 N2 -90.26(14) . . . . ? 
P1D Re1 C10 N2 90.26(14) 8_565 . . . ? 
N1 Re1 C10 C11 0.0 . . . . ? 
N2 Re1 C10 C11 180.0 . . . . ? 
P1 Re1 C10 C11 91.08(16) . . . . ? 
P1 Re1 C10 C11 -91.08(16) 8_565 . . . ? 
P1D Re1 C10 C11 89.74(14) . . . . ? 
P1D Re1 C10 C11 -89.74(14) 8_565 . . . ? 
N2 C10 C11 C12 0.0 . . . . ? 
Re1 C10 C11 C12 180.0 . . . . ? 
C10 C11 C12 C13 0.0 . . . . ? 
C10 C11 C12 C15 180.0 . . . . ? 
C11 C12 C13 C14 0.0 . . . . ? 
C15 C12 C13 C14 180.0 . . . . ? 
C10 N2 C14 C13 0.0 . . . . ? 
Re1 N2 C14 C13 180.000(3) . . . . ? 
C12 C13 C14 N2 0.0 . . . . ? 
 
_diffrn_measured_fraction_theta_max    0.999 
_diffrn_reflns_theta_full              32.53 
_diffrn_measured_fraction_theta_full   0.999 
_refine_diff_density_max    1.170 
_refine_diff_density_min   -0.900 
_refine_diff_density_rms    0.075 
